# Supplementary material
Source: PubMed Central journal article supplement (PMC7726053)
Supplement: NIHMS1643857-supplement-4.pdf [file NIHMS1643857-supplement-4.pdf]

Supplemental Table 1: List of genes in the PI3K/Akt pathway array and their differential expression represented as the relative fold change in Cd exposed (Cd-RWPE1; Cd-PWR1E) compared to parental normal (RWPE1; PWR1E) cells.

| Position | Unigene  | Refseq  | Symbol   | Description                                                                     | Fold Change: Cd-RWPE1 vs RWPE1 cells | Fold Change: Cd-PWR1E vs PWR1E cells |
|----------|----------|---------|----------|---------------------------------------------------------------------------------|--------------------------------------|--------------------------------------|
| A01      | Hs.12341 | NM_0011 | ADAR     | Adenosine deaminase, RNA-specific                                               | 1.0109                               | 4.19                                 |
| A02      | Hs.52562 | NM_0051 | AKT1     | V-akt murine thymoma viral oncogene homolog 1                                   | 0.9359                               | 1.78                                 |
| A03      | Hs.63153 | NM_0016 | AKT2     | V-akt murine thymoma viral oncogene homolog 2                                   | 0.9556                               | 1.37                                 |
| A04      | Hs.49829 | NM_0054 | AKT3     | V-akt murine thymoma viral oncogene homolog 3 (protein kinase B, gamma)         | 2.266                                | 1.12                                 |
| A05      | Hs.15893 | NM_0000 | APC      | Adenomatous polyposis coli                                                      | 0.8491                               | 2.48                                 |
| A06      | Hs.37025 | NM_0043 | BAD      | BCL2-associated agonist of cell death                                           | 1.2341                               | 3.17                                 |
| A07      | Hs.15949 | NM_0000 | BTK      | Bruton agammaglobulinemia tyrosine kinase                                       | 1.4062                               | 1.01                                 |
| A08      | Hs.32950 | NM_0012 | CASP9    | Caspase 9, apoptosis-related cysteine peptidase                                 | 1.1412                               | 5.24                                 |
| A09      | Hs.52385 | NM_0530 | CCND1    | Cyclin D1                                                                       | 1.7508                               | 1.25                                 |
| A10      | Hs.16386 | NM_0005 | CD14     | CD14 molecule                                                                   | 1.0109                               | 1.01                                 |
| A11      | Hs.46763 | NM_0017 | CDC42    | Cell division cycle 42 (GTP binding protein, 25kDa)                             | 1.1817                               | 2.87                                 |
| A12      | Hs.23899 | NM_0040 | CDKN1B   | Cyclin-dependent kinase inhibitor 1B (p27, Kip1)                                | 4.7557                               | 1.01                                 |
| B01      | Hs.19899 | NM_0012 | CHUK     | Conserved helix-loop-helix ubiquitous kinase                                    | 0.9051                               | 1.73                                 |
| B02      | Hs.64405 | NM_0018 | CSNK2A1  | Casein kinase 2, alpha 1 polypeptide                                            | 1.1579                               | 2.29                                 |
| B03      | Hs.71292 | NM_0019 | CTNNB1   | Catenin (cadherin-associated protein), beta 1, 88kDa                            | 1.8256                               | 1.01                                 |
| B04      | Hs.13143 | NM_0027 | EIF2AK2  | Eukaryotic translation initiation factor 2-alpha kinase 2                       | 0.7406                               | 1.3                                  |
| B05      | Hs.64839 | NM_0014 | EIF4B    | Eukaryotic translation initiation factor 4B                                     | 1.0327                               | 2.55                                 |
| B06      | Hs.24971 | NM_0019 | EIF4E    | Eukaryotic translation initiation factor 4E                                     | 1.4207                               | 1.31                                 |
| B07      | Hs.41164 | NM_0040 | EIF4EBP1 | Eukaryotic translation initiation factor 4E binding protein 1                   | 1.3973                               | 1.01                                 |
| B08      | Hs.43375 | NM_1829 | EIF4G1   | Eukaryotic translation initiation factor 4 gamma, 1                             | 0.7093                               | 2.2                                  |
| B09      | Hs.18112 | NM_0052 | ELK1     | ELK1, member of ETS oncogene family                                             | 4.5356                               | 1.01                                 |
| B10      | Hs.2007  | NM_0008 | FASLG    | Fas ligand (TNF superfamily, member 6)                                          | 3.2919                               | 1.01                                 |
| B11      | Hs.47193 | NM_0008 | FKBP1A   | FK506 binding protein 1A, 12kDa                                                 | 1.4954                               | 2.36                                 |
| B12      | Hs.25647 | NM_0052 | FOS      | FBJ murine osteosarcoma viral oncogene homolog                                  | 0.9177                               | 13.78                                |
| C01      | Hs.37066 | NM_0020 | FOXO1    | Forkhead box O1                                                                 | 0.9639                               | 1.01                                 |
| C02      | Hs.22095 | NM_0014 | FOXO3    | Forkhead box O3                                                                 | 1.2368                               | 1.57                                 |
| C03      | Hs.70069 | NM_0001 | GJA1     | Gap junction protein, alpha 1, 43kDa                                            | 0.7833                               | 1.01                                 |
| C04      | Hs.16406 | NM_0053 | GRB10    | Growth factor receptor-bound protein 10                                         | 0.4302                               | 1.01                                 |
| C05      | Hs.44435 | NM_0020 | GRB2     | Growth factor receptor-bound protein 2                                          | 0.3628                               | 3.08                                 |
| C06      | Hs.44573 | NM_0020 | GSK3B    | Glycogen synthase kinase 3 beta                                                 | 1.1175                               | 2.23                                 |
| C07      | Hs.37003 | NM_0053 | HRAS     | V-Ha-ras Harvey rat sarcoma viral oncogene homolog                              | 0.8712                               | 1.94                                 |
| C08      | Hs.52097 | NM_0015 | HSPB1    | Heat shock 27kDa protein 1                                                      | 1.2214                               | 8.78                                 |
| C09      | Hs.16056 | NM_0008 | IGF1     | Insulin-like growth factor 1 (somatomedin C)                                    | 0.0853                               | 1.01                                 |
| C10      | Hs.64312 | NM_0008 | IGF1R    | Insulin-like growth factor 1 receptor                                           | 0.9246                               | 1.57                                 |
| C11      | Hs.70635 | NM_0045 | ILK      | Integrin-linked kinase                                                          | 0.8761                               | 0.6                                  |
| C12      | Hs.52281 | NM_0015 | IRAK1    | Interleukin-1 receptor-associated kinase 1                                      | 0.8421                               | 1.01                                 |
| D01      | Hs.47150 | NM_0055 | IRS1     | Insulin receptor substrate 1                                                    | 0.3588                               | 1.01                                 |
| D02      | Hs.64381 | NM_0022 | ITGB1    | Integrin, beta 1 (fibronectin receptor, beta polypeptide, antigen CD29 include  | 1.2313                               | 5.13                                 |
| D03      | Hs.69668 | NM_0022 | JUN      | Jun proto-oncogene                                                              | 1.2054                               | 1.01                                 |
| D04      | Hs.14544 | NM_0027 | MAP2K1   | Mitogen-activated protein kinase kinase 1                                       | 0.7761                               | 1.28                                 |
| D05      | Hs.43185 | NM_0027 | MAPK1    | Mitogen-activated protein kinase 1                                              | 1.1425                               | 1.25                                 |
| D06      | Hs.48523 | NM_0013 | MAPK14   | Mitogen-activated protein kinase 14                                             | 1.2239                               | 6.41                                 |
| D07      | Hs.861   | NM_0027 | MAPK3    | Mitogen-activated protein kinase 3                                              | 1.1808                               | 4.6                                  |
| D08      | Hs.13821 | NM_0027 | MAPK8    | Mitogen-activated protein kinase 8                                              | 1.2811                               | 1.12                                 |
| D09      | Hs.6917  | NM_0010 | MTCP1    | Mature T-cell proliferation 1                                                   | 0.7074                               | 1.01                                 |
| D10      | Hs.33820 | NM_0049 | MTOR     | Mechanistic target of rapamycin (serine/threonine kinase)                       | 1.424                                | 1.01                                 |
| D11      | Hs.82116 | NM_0024 | MYD88    | Myeloid differentiation primary response gene (88)                              | 2.0934                               | 16.82                                |
| D12      | Hs.61843 | NM_0039 | NFKB1    | Nuclear factor of kappa light polypeptide gene enhancer in B-cells 1            | 2.1939                               | 0.88                                 |
| E01      | Hs.81328 | NM_0205 | NFKBIA   | Nuclear factor of kappa light polypeptide gene enhancer in B-cells inhibitor, a | 3.257                                | 1.01                                 |
| E02      | Hs.38780 | NM_0025 | PABPC1   | Poly(A) binding protein, cytoplasmic 1                                          | 1.9846                               | 1.81                                 |
| E03      | Hs.43571 | NM_0025 | PAK1     | P21 protein (Cdc42/Rac)-activated kinase 1                                      | 0.9724                               | 1.9                                  |
| E04      | Hs.74615 | NM_0062 | PDGFRA   | Platelet-derived growth factor receptor, alpha polypeptide                      | 4.1014                               | 1.01                                 |
| E05      | Hs.47063 | NM_0026 | PKD1     | Pyruvate dehydrogenase kinase, isozyme 1                                        | 1.2291                               | 0.1                                  |
| E06      | Hs.25666 | NM_0026 | PKD2     | Pyruvate dehydrogenase kinase, isozyme 2                                        | 1.1142                               | 1.12                                 |
| E07      | Hs.45969 | NM_0026 | PDPK1    | 3-phosphoinositide dependent protein kinase-1                                   | 2.1163                               | 0.87                                 |
| E08      | Hs.55349 | NM_0062 | PIK3CA   | Phosphoinositide-3-kinase, catalytic, alpha polypeptide                         | 1.9686                               | 1.94                                 |
| E09      | Hs.32942 | NM_0026 | PIK3CG   | Phosphoinositide-3-kinase, catalytic, gamma polypeptide                         | 1.0109                               | 1.01                                 |
| E10      | Hs.13222 | NM_1815 | PIK3R1   | Phosphoinositide-3-kinase, regulatory subunit 1 (alpha)                         | 0.4259                               | 1.13                                 |
| E11      | Hs.37134 | NM_0050 | PIK3R2   | Phosphoinositide-3-kinase, regulatory subunit 2 (beta)                          | 0.4714                               | 1.01                                 |
| E12      | Hs.53170 | NM_0027 | PRKCA    | Protein kinase C, alpha                                                         | 0.8681                               | 0.35                                 |
| F01      | Hs.46035 | NM_0027 | PRKCB    | Protein kinase C, beta                                                          | 1.4687                               | 1.01                                 |
| F02      | Hs.49625 | NM_0027 | PRKCZ    | Protein kinase C, zeta                                                          | 1.1688                               | 0.5                                  |
| F03      | Hs.72945 | NM_0003 | PTEN     | Phosphatase and tensin homolog                                                  | 1.5953                               | 3.45                                 |
| F04      | Hs.39548 | NM_0056 | PTK2     | PTK2 protein tyrosine kinase 2                                                  | 1.2349                               | 1.01                                 |
| F05      | Hs.50685 | NM_0028 | PTPN11   | Protein tyrosine phosphatase, non-receptor type 11                              | 0.8844                               | 1.65                                 |
| F06      | Hs.41381 | NM_0069 | RAC1     | Ras-related C3 botulinum toxin substrate 1 (rho family, small GTP binding pr    | 2.3357                               | 2.6                                  |
| F07      | Hs.15913 | NM_0028 | RAF1     | V-raf-1 murine leukemia viral oncogene homolog 1                                | 1.1696                               | 2.69                                 |
| F08      | Hs.66408 | NM_0028 | RASA1    | RAS p21 protein activator (GTPase activating protein) 1                         | 1.0444                               | 1.07                                 |
| F09      | Hs.51360 | NM_0056 | RBL2     | Retinoblastoma-like 2 (p130)                                                    | 1.2532                               | 3.25                                 |
| F10      | Hs.28352 | NM_0056 | RHEB     | Ras homolog enriched in brain                                                   | 1.1492                               | 2.09                                 |
| F11      | Hs.24707 | NM_0016 | RHOA     | Ras homolog gene family, member A                                               | 1.7431                               | 3.54                                 |
| F12      | Hs.14995 | NM_0029 | RPS6KA1  | Ribosomal protein S6 kinase, 90kDa, polypeptide 1                               | 1.9326                               | 1.08                                 |
| G01      | Hs.46364 | NM_0031 | RPS6KB1  | Ribosomal protein S6 kinase, 70kDa, polypeptide 1                               | 1.5061                               | 0.9                                  |
| G02      | Hs.43379 | NM_0030 | SHC1     | SHC (Src homology 2 domain containing) transforming protein 1                   | 0.6251                               | 1.11                                 |
| G03      | Hs.70989 | NM_0056 | SOS1     | Son of sevenless homolog 1 (Drosophila)                                         | 0.9167                               | 1.72                                 |
| G04      | Hs.52014 | NM_0031 | SRF      | Serum response factor (c-fos serum response element-binding transcription       | 0.651                                | 1.73                                 |
| G05      | Hs.2484  | NM_0219 | TCL1A    | T-cell leukemia/lymphoma 1A                                                     | 2.2175                               | 1.01                                 |
| G06      | Hs.53712 | NM_0010 | TIRAP    | Toll-interleukin 1 receptor (TIR) domain containing adaptor protein             | 0.2199                               | 1.01                                 |
| G07      | Hs.17431 | NM_1385 | TLR4     | Toll-like receptor 4                                                            | 7.3045                               | 1.01                                 |
| G08      | Hs.36852 | NM_0190 | TOLLIP   | Toll interacting protein                                                        | 2.0628                               | 1.01                                 |
| G09      | Hs.37085 | NM_0003 | TSC1     | Tuberous sclerosis 1                                                            | 1.1012                               | 1.48                                 |
| G10      | Hs.90303 | NM_0005 | TSC2     | Tuberous sclerosis 2                                                            | 1.3375                               | 1.01                                 |
| G11      | Hs.14372 | NM_0039 | WASL     | Wiskott-Aldrich syndrome-like                                                   | 0.748                                | 1.01                                 |
| G12      | Hs.22675 | NM_0034 | YWHAH    | Tyrosine 3-monooxygenase/tryptophan 5-monooxygenase activation protein,         | 0.7568                               | 1.57                                 |
| H01      | Hs.52064 | NM_0011 | ACTB     | Actin, beta                                                                     |                                      |                                      |
| H02      | Hs.53425 | NM_0040 | B2M      | Beta-2-microglobulin                                                            |                                      |                                      |
| H03      | Hs.59235 | NM_0020 | GAPDH    | Glyceraldehyde-3-phosphate dehydrogenase                                        |                                      |                                      |
| H04      | Hs.41270 | NM_0001 | HPRT1    | Hypoxanthine phosphoribosyltransferase 1                                        |                                      |                                      |
| H05      | Hs.54628 | NM_0010 | RPLP0    | Ribosomal protein, large, P0                                                    |                                      |                                      |
| H06      | N/A      | SA_0010 | HGDC     | Human Genomic DNA Contamination                                                 |                                      |                                      |
| H07      | N/A      | SA_0010 | RTC      | Reverse Transcription Control                                                   |                                      |                                      |
| H08      | N/A      | SA_0010 | RTC      | Reverse Transcription Control                                                   |                                      |                                      |
| H09      | N/A      | SA_0010 | RTC      | Reverse Transcription Control                                                   |                                      |                                      |
| H10      | N/A      | SA_0010 | PPC      | Positive PCR Control                                                            |                                      |                                      |
| H11      | N/A      | SA_0010 | PPC      | Positive PCR Control                                                            |                                      |                                      |
| H12      | N/A      | SA_0010 | PPC      | Positive PCR Control                                                            |                                      |                                      |
